# Supplementary material for: Theory of the kinetics of luminescence and its temperature dependence for Ag nanoclusters dispersed in a glass host
Source: Royal Society of Chemistry journal article supplement (doi:10.1039/c3cp52681j), 2013-01-01
Supplement: c3cp52681j.pdf [file c3cp52681j.pdf]

**Theory of the kinetics of luminescence and its temperature dependence for Ag nanoclusters dispersed in glass host.**

*Mikhail V. Shestakov<sup>a</sup>, Liviu F. Chibotaru<sup>a,b</sup>, Victor K. Tikhomirov<sup>a</sup>, Vicente D. Rodriguez<sup>c</sup>, Jose J. Velasquez<sup>c</sup>, Victor V. Moshchalkov<sup>a</sup>*

<sup>a</sup> *Institute for Nanoscale Physics and Chemistry, Katholieke Universiteit Leuven, Leuven, Belgium*

<sup>b</sup> *Chemistry Department, Katholieke Universiteit Leuven, Leuven, Belgium*

<sup>c</sup> *Departamento de Física Fundamental y Experimental, Electrónica y Sistemas, Universidad de La Laguna, Tenerife, Spain*

**Contents**

Introduction..... S3

Part 1 ..... S3

Part 2 ..... S5

Part 3 ..... S6

Part 4 ..... S8

References..... S10

## Introduction

In this supporting information file we find a solution of the system of the first order linear homogeneous differential equations:

$$\begin{cases} \dot{n}_1(t) = -(\Gamma_{12} + k_1)n_1(t) + \Gamma_{21}n_2(t) \\ \dot{n}_2(t) = \Gamma_{12}n_1(t) - (\Gamma_{21} + k_2)n_2(t) \end{cases} \quad (\text{S1})$$

where  $n_1(t)$  and  $n_2(t)$  are time-dependent functions of concentrations of electrons at  $S_1$  and  $T_2$  excited energy levels in agreement with energy level diagram of *Ag nanocluster* shown in Fig. 2 in the main body of paper,  $\dot{n}_1(t)$  and  $\dot{n}_2(t)$  are the first time derivatives of time-dependent functions of concentrations of electrons at  $S_1$  and  $T_2$  excited energy levels,  $k_1$  and  $k_2$  are the rates of spontaneous emission from  $S_1$  and  $T_2$  the excited states to  $S_0$  the ground state levels which are functions of emission wavelength,  $\Gamma_{12}$  and  $\Gamma_{21}$  are temperature-dependent rate functions of the intersystem crossing process from  $S_1$  to  $T_2$  excited levels and from  $T_2$  to  $S_1$  excited levels,  $t$  is independent variable which stands for time.

According to Ref.<sup>1</sup> a general solution of the system of linear homogeneous differential equations (S1) can be written using the time-dependent function:

$$n(t) = \begin{cases} n_1(t) = c_1 e^{-\lambda_1 t} + c_2 e^{-\lambda_2 t} \\ n_2(t) = c_3 e^{-\lambda_1 t} + c_4 e^{-\lambda_2 t} \end{cases} \quad (\text{S2})$$

where  $c_1$ ,  $c_2$ ,  $c_3$  and  $c_4$  are arbitrary coefficients,  $\lambda_1$  and  $\lambda_2$  are reciprocals of lifetimes  $\tau_1$  and  $\tau_2$ ,  $t$  is independent variable which stands for time. Putting  $t = 0$  in the general solution (S2) leads to the system of initial values equations for the system of differential Eqs. (S1):

$$\begin{cases} n_1(0) = c_1 + c_2 \\ n_2(0) = c_3 + c_4 \end{cases} \quad (\text{S3})$$

## Part 1

In Part 1 we find the unknown arbitrary coefficients  $c_1$ ,  $c_2$ ,  $c_3$  and  $c_4$  for the general solution (S2). Let us find these coefficients according to a procedure described in Ref.<sup>1</sup> We start with substituting  $n_1 = c_1 e^{-\lambda_1 t}$  and  $n_2 = c_3 e^{-\lambda_1 t}$  from the general solution (S2) into the system of Eqs. (S1):

$$\begin{cases} -\lambda_1 c_1 e^{-\lambda_1 t} = -(\Gamma_{12} + k_1)c_1 e^{-\lambda_1 t} + \Gamma_{21}c_3 e^{-\lambda_1 t} \\ -\lambda_1 c_3 e^{-\lambda_1 t} = \Gamma_{12}c_1 e^{-\lambda_1 t} - (\Gamma_{21} + k_2)c_3 e^{-\lambda_1 t} \end{cases} \quad (\text{S4})$$

We divide both sides of the system of Eqs. (S4) by  $e^{-\lambda_1 t}$ :

$$\begin{cases} -\lambda_1 c_1 = -(\Gamma_{12} + k_1)c_1 + \Gamma_{21}c_3 \\ -\lambda_1 c_3 = \Gamma_{12}c_1 - (\Gamma_{21} + k_2)c_3 \end{cases} \quad (\text{S5})$$

Adding the first and the second rows of the system of Eqs. (S5), we find:

$$-\lambda_1 c_1 - \lambda_1 c_3 = -(\Gamma_{12} + k_1)c_1 + \Gamma_{21}c_3 + \Gamma_{12}c_1 - (\Gamma_{21} + k_2)c_3 \quad (\text{S6})$$

Eq. (S6) gives:

$$\lambda_1 c_1 + \lambda_1 c_3 = k_1 c_1 + k_2 c_3 \quad (\text{S7})$$

Using the Eq. (S6) we find the expressions for the coefficients  $c_1$  and  $c_3$ :

$$c_1 = \frac{(\lambda_1 - k_2)}{(k_1 - \lambda_1)} c_3 \quad (\text{S8})$$

$$c_3 = \frac{(k_1 - \lambda_1)}{(\lambda_1 - k_2)} c_1 \quad (\text{S9})$$

By the analogy, we substitute  $n_1 = c_2 e^{-\lambda_2 t}$  and  $n_2 = c_4 e^{-\lambda_2 t}$  from the general solution (S2) into the system of Eqs. (S1) and apply the same procedure for finding of relations between the coefficients, we have:

$$c_2 = \frac{(\lambda_2 - k_2)}{(k_1 - \lambda_2)} c_4 \quad (\text{S10})$$

$$c_4 = \frac{(k_1 - \lambda_2)}{(\lambda_2 - k_2)} c_2 \quad (\text{S11})$$

Substituting (S9) and (S11) into the second row of the system of initial values Eqs. (S3), we find:

$$\begin{cases} c_1 = n_1(0) - c_2 \\ n_2(0) = \frac{(k_1 - \lambda_1)}{(\lambda_1 - k_2)} c_1 + \frac{(k_1 - \lambda_2)}{(\lambda_2 - k_2)} c_2 \end{cases} \quad (\text{S12})$$

Replacing the coefficient  $c_1$  in the second row of the system of Eqs. (S12) by the first row of the system of Eqs. (S12), we get:

$$\begin{cases} c_1 = n_1(0) - c_2 \\ n_2(0) = \frac{(k_1 - \lambda_1)}{(\lambda_1 - k_2)} (n_1(0) - c_2) + \frac{(k_1 - \lambda_2)}{(\lambda_2 - k_2)} c_2 \end{cases} \quad (\text{S13})$$

From the second row of the system of Eqs. (S13), we have:

$$\frac{(\lambda_2 - k_2)(\lambda_1 - k_2)}{(\lambda_1 - k_2)(\lambda_2 - k_2)} n_2(0) = \frac{(k_1 - \lambda_1)(\lambda_2 - k_2)}{(\lambda_1 - k_2)(\lambda_2 - k_2)} (n_1(0) - c_2) + \frac{(\lambda_1 - k_2)(k_1 - \lambda_2)}{(\lambda_1 - k_2)(\lambda_2 - k_2)} c_2 \quad (\text{S14})$$

$$\frac{(\lambda_2 - k_2)(\lambda_1 - k_2)}{(\lambda_1 - k_2)(\lambda_2 - k_2)} n_2(0) - \frac{(k_1 - \lambda_1)(\lambda_2 - k_2)}{(\lambda_1 - k_2)(\lambda_2 - k_2)} n_1(0) = -\frac{(k_1 - \lambda_1)(\lambda_2 - k_2)}{(\lambda_1 - k_2)(\lambda_2 - k_2)} c_2 + \frac{(\lambda_1 - k_2)(k_1 - \lambda_2)}{(\lambda_1 - k_2)(\lambda_2 - k_2)} c_2 \quad (\text{S15})$$

$$(\lambda_2 - k_2)(\lambda_1 - k_2)n_2(0) + (\lambda_1 - k_1)(\lambda_2 - k_2)n_1(0) = (\lambda_1 k_1 + \lambda_2 k_2 - \lambda_2 k_1 - \lambda_1 k_2)c_2 \quad (\text{S16})$$

Let us define  $c_2$  as equal to the left side of (S16):

$$c_2 = \frac{(\lambda_2 - k_2)(\lambda_1 - k_2)n_2(0) + (\lambda_1 - k_1)(\lambda_2 - k_2)n_1(0)}{(\lambda_1 - \lambda_2)(k_1 - k_2)} = \frac{(\lambda_1 - k_1)(\lambda_2 - k_2)}{(\lambda_1 - \lambda_2)(k_1 - k_2)} n_1(0) + \frac{(\lambda_2 - k_2)(\lambda_1 - k_2)}{(\lambda_1 - \lambda_2)(k_1 - k_2)} n_2(0) =$$

$$\frac{(\lambda_1 - k_1)(\lambda_2 - k_2)}{(\lambda_1 - \lambda_2)(k_1 - k_2)} n_1(0) - \frac{(k_2 - \lambda_2)(\lambda_1 - k_2)}{(\lambda_1 - \lambda_2)(k_1 - k_2)} n_2(0) \quad (\text{S17})$$

Now we find the coefficient  $c_1$ . Substitution Eq. (S17) into the first row of the system of Eqs. (S13) gives:

$$c_1 = \frac{(\lambda_1 - \lambda_2)(k_1 - k_2)}{(\lambda_1 - \lambda_2)(k_1 - k_2)} n_1(0) - \frac{(\lambda_1 - k_1)(\lambda_2 - k_2)}{(\lambda_1 - \lambda_2)(k_1 - k_2)} n_1(0) - \frac{(\lambda_2 - k_2)(\lambda_1 - k_2)}{(\lambda_1 - \lambda_2)(k_1 - k_2)} n_2(0) =$$

$$\frac{(\lambda_1 k_1 - \lambda_1 k_2 - \lambda_2 k_1 + \lambda_2 k_2)}{(\lambda_1 - \lambda_2)(k_1 - k_2)} n_1(0) - \frac{(\lambda_1 \lambda_2 - \lambda_1 k_2 - \lambda_2 k_1 + k_1 k_2)}{(\lambda_1 - \lambda_2)(k_1 - k_2)} n_1(0) - \frac{(\lambda_2 - k_2)(\lambda_1 - k_2)}{(\lambda_1 - \lambda_2)(k_1 - k_2)} n_2(0) =$$

$$\frac{(\lambda_1 k_1 - k_1 k_2 - \lambda_1 \lambda_2 + \lambda_2 k_2)}{(\lambda_1 - \lambda_2)(k_1 - k_2)} n_1(0) - \frac{(\lambda_2 - k_2)(\lambda_1 - k_2)}{(\lambda_1 - \lambda_2)(k_1 - k_2)} n_2(0) = \frac{(\lambda_1 - k_2)(k_1 - \lambda_2)}{(\lambda_1 - \lambda_2)(k_1 - k_2)} n_1(0) - \frac{(\lambda_2 - k_2)(\lambda_1 - k_2)}{(\lambda_1 - \lambda_2)(k_1 - k_2)} n_2(0) \quad (\text{S18})$$

Now we find the coefficients  $c_3$  and  $c_4$ . Replacing the coefficient  $c_1$  in the Eq. (S9) by the Eq. (S18), we find:

$$c_3 = \frac{(k_1 - \lambda_1)}{(\lambda_1 - k_2)} c_1 = \frac{(k_1 - \lambda_1)}{(\lambda_1 - k_2)} \left( \frac{(\lambda_1 - k_2)(k_1 - \lambda_2)}{(\lambda_1 - \lambda_2)(k_1 - k_2)} n_1(0) - \frac{(\lambda_2 - k_2)(\lambda_1 - k_2)}{(\lambda_1 - \lambda_2)(k_1 - k_2)} n_2(0) \right) = \frac{(k_1 - \lambda_1)(k_1 - \lambda_2)}{(\lambda_1 - \lambda_2)(k_1 - k_2)} n_1(0) - \frac{(\lambda_2 - k_2)(k_1 - \lambda_1)}{(\lambda_1 - \lambda_2)(k_1 - k_2)} n_2(0) \quad (\text{S19})$$

Replacing the coefficient  $c_2$  in the Eq. (S11) by the Eq. (S17), we find:

$$c_4 = \frac{(k_1 - \lambda_2)}{(\lambda_2 - k_2)} c_2 = \frac{(k_1 - \lambda_2)}{(\lambda_2 - k_2)} \left( \frac{(\lambda_1 - k_1)(\lambda_2 - k_2)}{(\lambda_1 - \lambda_2)(k_1 - k_2)} n_1(0) + \frac{(\lambda_2 - k_2)(\lambda_1 - k_2)}{(\lambda_1 - \lambda_2)(k_1 - k_2)} n_2(0) \right) = \frac{(\lambda_1 - k_1)(k_1 - \lambda_2)}{(\lambda_1 - \lambda_2)(k_1 - k_2)} n_1(0) - \frac{(\lambda_2 - k_1)(\lambda_1 - k_2)}{(\lambda_1 - \lambda_2)(k_1 - k_2)} n_2(0) \quad (\text{S20})$$

Substitution the Eqs. (S17), (S18), (S19) and (S20) into the general solution (S2) gives the final solution of the system of differential Eqs. (S1) is:

$$n_1 = \left( \frac{(\lambda_1 - k_2)(k_1 - \lambda_2)}{(\lambda_1 - \lambda_2)(k_1 - k_2)} n_1(0) - \frac{(\lambda_2 - k_2)(\lambda_1 - k_2)}{(\lambda_1 - \lambda_2)(k_1 - k_2)} n_2(0) \right) e^{-\lambda_1 t} + \left( \frac{(\lambda_1 - k_1)(\lambda_2 - k_2)}{(\lambda_1 - \lambda_2)(k_1 - k_2)} n_1(0) - \frac{(k_2 - \lambda_2)(\lambda_1 - k_2)}{(\lambda_1 - \lambda_2)(k_1 - k_2)} n_2(0) \right) e^{-\lambda_2 t} \quad (\text{S21})$$

$$n_2 = \left( \frac{(k_1 - \lambda_1)(k_1 - \lambda_2)}{(\lambda_1 - \lambda_2)(k_1 - k_2)} n_1(0) - \frac{(\lambda_2 - k_2)(k_1 - \lambda_1)}{(\lambda_1 - \lambda_2)(k_1 - k_2)} n_2(0) \right) e^{-\lambda_1 t} + \left( \frac{(\lambda_1 - k_1)(k_1 - \lambda_2)}{(\lambda_1 - \lambda_2)(k_1 - k_2)} n_1(0) - \frac{(\lambda_2 - k_1)(\lambda_1 - k_2)}{(\lambda_1 - \lambda_2)(k_1 - k_2)} n_2(0) \right) e^{-\lambda_2 t} \quad (\text{S22})$$

## Part 2

In Part 2 we check out the solution (S21) and (S22) for the system of differential Eqs. (S1). Addition the first and the second rows of the system of differential Eqs. (S1) gives:

$$\dot{n}_1(t) + \dot{n}_2(t) = -k_1 n_1(t) - k_2 n_2(t) \quad (\text{S23})$$

We replace  $n_1(t)$  and  $n_2(t)$  in the differential Eq. (S23) by the Eqs. (S21) and (S22):

$$-\lambda_1 \left( \frac{(\lambda_1 - k_2)(k_1 - \lambda_2)}{(\lambda_1 - \lambda_2)(k_1 - k_2)} n_1(0) - \frac{(\lambda_2 - k_2)(\lambda_1 - k_2)}{(\lambda_1 - \lambda_2)(k_1 - k_2)} n_2(0) \right) e^{-\lambda_1 t} - \lambda_2 \left( \frac{(\lambda_1 - k_1)(\lambda_2 - k_2)}{(\lambda_1 - \lambda_2)(k_1 - k_2)} n_1(0) - \frac{(k_2 - \lambda_2)(\lambda_1 - k_2)}{(\lambda_1 - \lambda_2)(k_1 - k_2)} n_2(0) \right) e^{-\lambda_2 t} -$$

$$-\lambda_1 \left( \frac{(k_1 - \lambda_1)(k_1 - \lambda_2)}{(\lambda_1 - \lambda_2)(k_1 - k_2)} n_1(0) - \frac{(\lambda_2 - k_2)(k_1 - \lambda_1)}{(\lambda_1 - \lambda_2)(k_1 - k_2)} n_2(0) \right) e^{-\lambda_1 t} - \lambda_2 \left( \frac{(\lambda_1 - k_1)(k_1 - \lambda_2)}{(\lambda_1 - \lambda_2)(k_1 - k_2)} n_1(0) - \frac{(\lambda_2 - k_1)(\lambda_1 - k_2)}{(\lambda_1 - \lambda_2)(k_1 - k_2)} n_2(0) \right) e^{-\lambda_2 t} =$$

$$-k_1 \left( \left( \frac{(\lambda_1 - k_2)(k_1 - \lambda_2)}{(\lambda_1 - \lambda_2)(k_1 - k_2)} n_1(0) - \frac{(\lambda_2 - k_2)(\lambda_1 - k_2)}{(\lambda_1 - \lambda_2)(k_1 - k_2)} n_2(0) \right) e^{-\lambda_1 t} + \left( \frac{(\lambda_1 - k_1)(\lambda_2 - k_2)}{(\lambda_1 - \lambda_2)(k_1 - k_2)} n_1(0) - \frac{(k_2 - \lambda_2)(\lambda_1 - k_2)}{(\lambda_1 - \lambda_2)(k_1 - k_2)} n_2(0) \right) e^{-\lambda_2 t} \right) -$$

$$-k_2 \left( \left( \frac{(k_1 - \lambda_1)(k_1 - \lambda_2)}{(\lambda_1 - \lambda_2)(k_1 - k_2)} n_1(0) - \frac{(\lambda_2 - k_2)(k_1 - \lambda_1)}{(\lambda_1 - \lambda_2)(k_1 - k_2)} n_2(0) \right) e^{-\lambda_1 t} + \left( \frac{(\lambda_1 - k_1)(k_1 - \lambda_2)}{(\lambda_1 - \lambda_2)(k_1 - k_2)} n_1(0) - \frac{(\lambda_2 - k_1)(\lambda_1 - k_2)}{(\lambda_1 - \lambda_2)(k_1 - k_2)} n_2(0) \right) e^{-\lambda_2 t} \right) \quad (\text{S24})$$

The Eq. (S24) is to be true for all values of  $t$ , then the coefficients of  $e^{-\lambda_1 t}$  and  $e^{-\lambda_2 t}$  must vanish. Now we consider the equation for the coefficients of  $e^{-\lambda_1 t}$  which follows from the Eq. (S24):

$$\begin{aligned} & -\lambda_1 \left( \frac{(\lambda_1 - k_2)(k_1 - \lambda_2)}{(\lambda_1 - \lambda_2)(k_1 - k_2)} n_1(0) - \frac{(\lambda_2 - k_2)(\lambda_1 - k_2)}{(\lambda_1 - \lambda_2)(k_1 - k_2)} n_2(0) \right) e^{-\lambda_1 t} - \lambda_1 \left( \frac{(k_1 - \lambda_1)(k_1 - \lambda_2)}{(\lambda_1 - \lambda_2)(k_1 - k_2)} n_1(0) - \frac{(\lambda_2 - k_2)(k_1 - \lambda_1)}{(\lambda_1 - \lambda_2)(k_1 - k_2)} n_2(0) \right) e^{-\lambda_1 t} = \\ & -k_1 \left( \frac{(\lambda_1 - k_2)(k_1 - \lambda_2)}{(\lambda_1 - \lambda_2)(k_1 - k_2)} n_1(0) - \frac{(\lambda_2 - k_2)(\lambda_1 - k_2)}{(\lambda_1 - \lambda_2)(k_1 - k_2)} n_2(0) \right) e^{-\lambda_1 t} - k_2 \left( \frac{(k_1 - \lambda_1)(k_1 - \lambda_2)}{(\lambda_1 - \lambda_2)(k_1 - k_2)} n_1(0) - \frac{(\lambda_2 - k_2)(k_1 - \lambda_1)}{(\lambda_1 - \lambda_2)(k_1 - k_2)} n_2(0) \right) e^{-\lambda_1 t} \quad (\text{S25}) \end{aligned}$$

Division of the Eq. (S25) by  $e^{-\lambda_1 t}$  gives:

$$\begin{aligned} & -\lambda_1 \left( \frac{(\lambda_1 - k_2)(k_1 - \lambda_2)}{(\lambda_1 - \lambda_2)(k_1 - k_2)} n_1(0) - \frac{(\lambda_2 - k_2)(\lambda_1 - k_2)}{(\lambda_1 - \lambda_2)(k_1 - k_2)} n_2(0) \right) - \lambda_1 \left( \frac{(k_1 - \lambda_1)(k_1 - \lambda_2)}{(\lambda_1 - \lambda_2)(k_1 - k_2)} n_1(0) - \frac{(\lambda_2 - k_2)(k_1 - \lambda_1)}{(\lambda_1 - \lambda_2)(k_1 - k_2)} n_2(0) \right) = \\ & -k_1 \left( \frac{(\lambda_1 - k_2)(k_1 - \lambda_2)}{(\lambda_1 - \lambda_2)(k_1 - k_2)} n_1(0) - \frac{(\lambda_2 - k_2)(\lambda_1 - k_2)}{(\lambda_1 - \lambda_2)(k_1 - k_2)} n_2(0) \right) - k_2 \left( \frac{(k_1 - \lambda_1)(k_1 - \lambda_2)}{(\lambda_1 - \lambda_2)(k_1 - k_2)} n_1(0) - \frac{(\lambda_2 - k_2)(k_1 - \lambda_1)}{(\lambda_1 - \lambda_2)(k_1 - k_2)} n_2(0) \right) \quad (\text{S26}) \end{aligned}$$

Eq. (S26) gives:

$$\begin{aligned} & \left( -\lambda_1 \frac{(\lambda_1 - k_2)(k_1 - \lambda_2)}{(\lambda_1 - \lambda_2)(k_1 - k_2)} - \lambda_1 \frac{(k_1 - \lambda_1)(k_1 - \lambda_2)}{(\lambda_1 - \lambda_2)(k_1 - k_2)} + k_1 \frac{(\lambda_1 - k_2)(k_1 - \lambda_2)}{(\lambda_1 - \lambda_2)(k_1 - k_2)} + k_2 \frac{(k_1 - \lambda_1)(k_1 - \lambda_2)}{(\lambda_1 - \lambda_2)(k_1 - k_2)} \right) n_1(0) = \left( -\lambda_1 \frac{(\lambda_2 - k_2)(\lambda_1 - k_2)}{(\lambda_1 - \lambda_2)(k_1 - k_2)} - \lambda_1 \frac{(\lambda_2 - k_2)(k_1 - \lambda_1)}{(\lambda_1 - \lambda_2)(k_1 - k_2)} + \right. \\ & \left. k_1 \frac{(\lambda_2 - k_2)(\lambda_1 - k_2)}{(\lambda_1 - \lambda_2)(k_1 - k_2)} + k_2 \frac{(\lambda_2 - k_2)(k_1 - \lambda_1)}{(\lambda_1 - \lambda_2)(k_1 - k_2)} \right) n_2(0) \quad (\text{S27}) \end{aligned}$$

Eq. (S27) becomes:

$$\left( \frac{(\lambda_1 - k_2)(k_1 - \lambda_2)(k_1 - \lambda_1)}{(\lambda_1 - \lambda_2)(k_1 - k_2)} - \frac{(\lambda_1 - k_2)(k_1 - \lambda_2)(k_1 - \lambda_1)}{(\lambda_1 - \lambda_2)(k_1 - k_2)} \right) n_1(0) = \left( \frac{(\lambda_2 - k_2)(\lambda_1 - k_2)(k_1 - \lambda_1)}{(\lambda_1 - \lambda_2)(k_1 - k_2)} - \frac{(\lambda_2 - k_2)(\lambda_1 - k_2)(k_1 - \lambda_1)}{(\lambda_1 - \lambda_2)(k_1 - k_2)} \right) n_2(0) \quad (\text{S28})$$

Now we consider the equation for the coefficients of  $e^{-\lambda_2 t}$  which follows from the Eq. (S28):

$$\begin{aligned} & -\lambda_2 \left( \frac{(\lambda_1 - k_1)(\lambda_2 - k_2)}{(\lambda_1 - \lambda_2)(k_1 - k_2)} n_1(0) - \frac{(k_2 - \lambda_2)(\lambda_1 - k_2)}{(\lambda_1 - \lambda_2)(k_1 - k_2)} n_2(0) \right) e^{-\lambda_2 t} - \lambda_2 \left( \frac{(\lambda_1 - k_1)(k_1 - \lambda_2)}{(\lambda_1 - \lambda_2)(k_1 - k_2)} n_1(0) - \frac{(\lambda_2 - k_1)(\lambda_1 - k_2)}{(\lambda_1 - \lambda_2)(k_1 - k_2)} n_2(0) \right) e^{-\lambda_2 t} = \\ & -k_1 \left( \frac{(\lambda_1 - k_1)(\lambda_2 - k_2)}{(\lambda_1 - \lambda_2)(k_1 - k_2)} n_1(0) - \frac{(k_2 - \lambda_2)(\lambda_1 - k_2)}{(\lambda_1 - \lambda_2)(k_1 - k_2)} n_2(0) \right) e^{-\lambda_2 t} - k_2 \left( \frac{(\lambda_1 - k_1)(k_1 - \lambda_2)}{(\lambda_1 - \lambda_2)(k_1 - k_2)} n_1(0) - \frac{(\lambda_2 - k_1)(\lambda_1 - k_2)}{(\lambda_1 - \lambda_2)(k_1 - k_2)} n_2(0) \right) e^{-\lambda_2 t} \quad (\text{S29}) \end{aligned}$$

Division of the Eq. (S29) by  $e^{-\lambda_2 t}$  gives:

$$\begin{aligned} & -\lambda_2 \left( \frac{(\lambda_1 - k_1)(\lambda_2 - k_2)}{(\lambda_1 - \lambda_2)(k_1 - k_2)} n_1(0) - \frac{(k_2 - \lambda_2)(\lambda_1 - k_2)}{(\lambda_1 - \lambda_2)(k_1 - k_2)} n_2(0) \right) - \lambda_2 \left( \frac{(\lambda_1 - k_1)(k_1 - \lambda_2)}{(\lambda_1 - \lambda_2)(k_1 - k_2)} n_1(0) - \frac{(\lambda_2 - k_1)(\lambda_1 - k_2)}{(\lambda_1 - \lambda_2)(k_1 - k_2)} n_2(0) \right) = \\ & -k_1 \left( \frac{(\lambda_1 - k_1)(\lambda_2 - k_2)}{(\lambda_1 - \lambda_2)(k_1 - k_2)} n_1(0) - \frac{(k_2 - \lambda_2)(\lambda_1 - k_2)}{(\lambda_1 - \lambda_2)(k_1 - k_2)} n_2(0) \right) - k_2 \left( \frac{(\lambda_1 - k_1)(k_1 - \lambda_2)}{(\lambda_1 - \lambda_2)(k_1 - k_2)} n_1(0) - \frac{(\lambda_2 - k_1)(\lambda_1 - k_2)}{(\lambda_1 - \lambda_2)(k_1 - k_2)} n_2(0) \right) \quad (\text{S30}) \end{aligned}$$

Eq. (S30) becomes:

$$\begin{aligned} & \left( -\lambda_2 \frac{(\lambda_1 - k_1)(\lambda_2 - k_2)}{(\lambda_1 - \lambda_2)(k_1 - k_2)} - \lambda_2 \frac{(\lambda_1 - k_1)(k_1 - \lambda_2)}{(\lambda_1 - \lambda_2)(k_1 - k_2)} + k_1 \frac{(\lambda_1 - k_1)(\lambda_2 - k_2)}{(\lambda_1 - \lambda_2)(k_1 - k_2)} + k_2 \frac{(\lambda_1 - k_1)(k_1 - \lambda_2)}{(\lambda_1 - \lambda_2)(k_1 - k_2)} \right) n_1(0) = \left( -\lambda_2 \frac{(k_2 - \lambda_2)(\lambda_1 - k_2)}{(\lambda_1 - \lambda_2)(k_1 - k_2)} - \lambda_2 \frac{(\lambda_2 - k_1)(\lambda_1 - k_2)}{(\lambda_1 - \lambda_2)(k_1 - k_2)} + \right. \\ & \left. k_1 \frac{(k_2 - \lambda_2)(\lambda_1 - k_2)}{(\lambda_1 - \lambda_2)(k_1 - k_2)} + k_2 \frac{(\lambda_2 - k_1)(\lambda_1 - k_2)}{(\lambda_1 - \lambda_2)(k_1 - k_2)} \right) n_2(0) \quad (\text{S31}) \end{aligned}$$

Eq. (S31) gives:

$$\left( \frac{(\lambda_1 - k_1)(k_1 - \lambda_2)(\lambda_2 - k_2)}{(\lambda_1 - \lambda_2)(k_1 - k_2)} - \frac{(\lambda_1 - k_1)(k_1 - \lambda_2)(\lambda_2 - k_2)}{(\lambda_1 - \lambda_2)(k_1 - k_2)} \right) n_1(0) = \left( \frac{(k_2 - \lambda_2)(\lambda_1 - k_2)(k_1 - \lambda_2)}{(\lambda_1 - \lambda_2)(k_1 - k_2)} - \frac{(k_2 - \lambda_2)(\lambda_1 - k_2)(k_1 - \lambda_2)}{(\lambda_1 - \lambda_2)(k_1 - k_2)} \right) n_2(0) \quad (\text{S32})$$

### Part 3

In Part 3 we find the expressions for  $\Gamma_{l2}$  and  $\Gamma_{2l}$ . We replace  $c_3$  in the first row and  $c_1$  in the second row of the system of Eqs. (S5) by (S9) and (S8):

$$\begin{cases} -\lambda_1 c_1 = -(\Gamma_{12} + k_1)c_1 + \Gamma_{21} \frac{(k_1 - \lambda_1)}{(\lambda_1 - k_2)} c_1 \\ -\lambda_1 c_3 = \Gamma_{12} \frac{(\lambda_1 - k_2)}{(k_1 - \lambda_1)} c_3 - (\Gamma_{21} + k_2)c_3 \end{cases} \quad (\text{S33})$$

We define  $\lambda_1$  as the left side of the first and second rows of the system of Eqs. (S33)

$$\begin{cases} -\lambda_1 = -(\Gamma_{12} + k_1) + \Gamma_{21} \frac{(k_1 - \lambda_1)}{(\lambda_1 - k_2)} \\ -\lambda_1 = \Gamma_{12} \frac{(\lambda_1 - k_2)}{(k_1 - \lambda_1)} - (\Gamma_{21} + k_2) \end{cases} \quad (\text{S34})$$

The first and the second rows of the system of Eqs. (S34) are equivalent to each other. Subsequently, we have:

$$-(\Gamma_{12} + k_1) + \Gamma_{21} \frac{(k_1 - \lambda_1)}{(\lambda_1 - k_2)} = \Gamma_{12} \frac{(\lambda_1 - k_2)}{(k_1 - \lambda_1)} - (\Gamma_{21} + k_2) \quad (\text{S35})$$

Eq. (S35) gives:

$$\Gamma_{12} \frac{(k_1 - k_2)}{(k_1 - \lambda_1)} = \Gamma_{21} \frac{(k_1 - k_2)}{(\lambda_1 - k_2)} - (k_1 - k_2) \quad (\text{S36})$$

Dividing the Eq. (S36) by  $(k_1 - k_2)$ , we find:

$$\Gamma_{12} = (k_1 - \lambda_1) \left( \Gamma_{21} \frac{1}{(\lambda_1 - k_2)} - 1 \right) \quad (\text{S37})$$

We substitute the  $n_1 = c_2 e^{-\lambda_1 t}$  and  $n_2 = c_4 e^{-\lambda_1 t}$  from the general solution (S2) into the system of Eqs. (S1):

$$\begin{cases} -\lambda_2 c_2 = -(\Gamma_{12} + k_1)c_2 + \Gamma_{21} c_4 \\ -\lambda_2 c_4 = \Gamma_{12} c_2 - (\Gamma_{21} + k_2)c_4 \end{cases} \quad (\text{S38})$$

By the analogy, we replace  $c_4$  in the first row and  $c_2$  in the second row of the system of Eqs. (S38) by (S10) and (S11):

$$\begin{cases} -\lambda_2 c_2 = -(\Gamma_{12} + k_1)c_2 + \Gamma_{21} \frac{(k_1 - \lambda_2)}{(\lambda_2 - k_2)} c_2 \\ -\lambda_2 c_4 = \Gamma_{12} \frac{(\lambda_2 - k_2)}{(k_1 - \lambda_2)} c_4 - (\Gamma_{21} + k_2)c_4 \end{cases} \quad (\text{S39})$$

We define  $\lambda_2$  as the left side of the first and second rows of the system of Eqs. (S39):

$$\begin{cases} -\lambda_2 = -(\Gamma_{12} + k_1) + \Gamma_{21} \frac{(k_1 - \lambda_2)}{(\lambda_2 - k_2)} \\ -\lambda_2 = \Gamma_{12} \frac{(\lambda_2 - k_2)}{(k_1 - \lambda_2)} - (\Gamma_{21} + k_2) \end{cases} \quad (\text{S40})$$

The first and the second rows of the system of Eqs. (S40) are equivalent to each other. Subsequently, we have:

$$-(\Gamma_{12} + k_1) + \Gamma_{21} \frac{(k_1 - \lambda_2)}{(\lambda_2 - k_2)} = \Gamma_{12} \frac{(\lambda_2 - k_2)}{(k_1 - \lambda_2)} - (\Gamma_{21} + k_2) \quad (\text{S41})$$

Eq. (S41) gives:

$$\Gamma_{12} \left( \frac{(k_1 - k_2)}{(k_1 - \lambda_2)} \right) = \Gamma_{21} \frac{(k_1 - k_2)}{(\lambda_2 - k_2)} - (k_1 - k_2) \quad (\text{S42})$$

Dividing the Eq. (S42) by  $(k_1 - k_2)$ , we get:

$$\Gamma_{12} = (k_1 - \lambda_2) \left( \Gamma_{21} \frac{1}{(\lambda_2 - k_2)} - 1 \right) \quad (\text{S43})$$

The Eqs. (S37) and (S43) are equivalent. Subsequently, we have:

$$(k_1 - \lambda_1) \left( \Gamma_{21} \frac{1}{(\lambda_1 - k_2)} - 1 \right) = (k_1 - \lambda_2) \left( \Gamma_{21} \frac{1}{(\lambda_2 - k_2)} - 1 \right) \quad (\text{S44})$$

Eq. (S44) gives:

$$\left( \Gamma_{21} \frac{1}{(\lambda_1 - k_2)} - 1 \right) = \frac{(k_1 - \lambda_2)}{(k_1 - \lambda_1)} \left( \Gamma_{21} \frac{1}{(\lambda_2 - k_2)} - 1 \right) \quad (\text{S45})$$

$$\Gamma_{21} \left( \frac{(k_1 - \lambda_1)(\lambda_2 - k_2) - (k_1 - \lambda_2)(\lambda_1 - k_2)}{(k_1 - \lambda_1)(\lambda_2 - k_2)(\lambda_1 - k_2)} \right) = \frac{(k_1 - \lambda_1) - (k_1 - \lambda_2)}{(k_1 - \lambda_1)} \quad (\text{S46})$$

$$\Gamma_{21} \left( \frac{(k_1 \lambda_2 - k_1 k_2 - \lambda_1 \lambda_2 + \lambda_1 k_2) - (k_1 \lambda_1 - k_1 k_2 - \lambda_1 \lambda_2 + \lambda_2 k_2)}{(k_1 - \lambda_1)(\lambda_2 - k_2)(\lambda_1 - k_2)} \right) = \frac{(\lambda_2 - \lambda_1)}{(k_1 - \lambda_1)} \quad (\text{S47})$$

$$\Gamma_{21} \left( \frac{(k_1 - k_2)(\lambda_2 - \lambda_1)}{(k_1 - \lambda_1)(\lambda_2 - k_2)(\lambda_1 - k_2)} \right) = \frac{(\lambda_2 - \lambda_1)}{(k_1 - \lambda_1)} \quad (\text{S48})$$

We define  $\Gamma_{21}$  as the left side of Eq. (S48):

$$\Gamma_{21} = \frac{(\lambda_2 - k_2)(\lambda_1 - k_2)}{(k_1 - k_2)} \quad (\text{S49})$$

Substituting Eq. (S49) into Eq. (S37), we find  $\Gamma_{12}$ :

$$\begin{aligned} \Gamma_{12} &= (k_1 - \lambda_1) \left( \Gamma_{21} \frac{1}{(\lambda_1 - k_2)} - 1 \right) = (k_1 - \lambda_1) \left( \frac{(\lambda_2 - k_2)(\lambda_1 - k_2)}{(k_1 - k_2)} \frac{1}{(\lambda_1 - k_2)} - 1 \right) = (k_1 - \lambda_1) \left( \frac{(\lambda_2 - k_2)}{(k_1 - k_2)} - 1 \right) = \\ &= (k_1 - \lambda_1) \left( \frac{(\lambda_2 - k_2) - (k_1 - k_2)}{(k_1 - k_2)} \right) = \frac{(\lambda_2 - k_1)(k_1 - \lambda_1)}{(k_1 - k_2)} \end{aligned} \quad (\text{S50})$$

#### Part 4

In part 4 we find expressions for  $\lambda_1$  and  $\lambda_2$ . We define  $\lambda_2$  as the left side of Eq. (S49):

$$\lambda_2 = \Gamma_{21} \frac{(k_1 - k_2)}{(\lambda_1 - k_2)} + k_2 \quad (\text{S51})$$

Replacing  $\lambda_2$  in Eq. (S50) by Eq. (S51) gives:

$$\Gamma_{12} = \left( \frac{(\lambda_2 - k_1)(k_1 - \lambda_1)}{(k_1 - k_2)} \right) = \left( \frac{\left( \Gamma_{21} \frac{(k_1 - k_2)}{(\lambda_1 - k_2)} + k_2 - k_1 \right) (k_1 - \lambda_1)}{(k_1 - k_2)} \right) = \left( \Gamma_{21} \frac{1}{(\lambda_1 - k_2)} - 1 \right) (k_1 - \lambda_1) \quad (\text{S52})$$



Eq. (S52) gives:

$$\Gamma_{12}(\lambda_1 - k_2) = \Gamma_{21}(k_1 - \lambda_1) - (k_1 - \lambda_1)(\lambda_1 - k_2) \quad (\text{S53})$$

Eq. (S53) becomes:

$$\lambda_1^2 - (k_1 + k_2 + \Gamma_{12} + \Gamma_{21})\lambda_1 + k_1k_2 + \Gamma_{21}k_1 + \Gamma_{12}k_2 = 0 \quad (\text{S54})$$

Now we define  $\lambda_1$  as the left part of Eq. (S49):

$$\lambda_1 = \Gamma_{21} \frac{(k_1 - k_2)}{(\lambda_2 - k_2)} + k_2 \quad (\text{S55})$$

Substitution Eq. (S55) into Eq. (S50) gives:

$$\Gamma_{12} = \left( \frac{(\lambda_2 - k_1) \left( k_1 - \Gamma_{21} \frac{(k_1 - k_2)}{(\lambda_2 - k_2)} - k_2 \right)}{(k_1 - k_2)} \right) = \left( (\lambda_2 - k_1) - \Gamma_{21} \frac{(\lambda_2 - k_1)}{(\lambda_2 - k_2)} \right) = \frac{(\lambda_2 - k_1)(\lambda_2 - k_2) - \Gamma_{21}(\lambda_2 - k_1)}{(\lambda_2 - k_2)} = \frac{\lambda_2^2 - k_1\lambda_2 - k_1\lambda_2 + k_1k_2 - \Gamma_{21}(\lambda_2 - k_1)}{(\lambda_2 - k_2)} \quad (\text{S56})$$

Eq. (S56) becomes:

$$\lambda_2^2 - (k_1 + k_2 + \Gamma_{21} + \Gamma_{12})\lambda_2 + k_1k_2 + \Gamma_{21}k_1 + \Gamma_{12}k_2 = 0 \quad (\text{S57})$$

Eqs. (S54) and (S57) are equivalent. Subsequently, solutions for these equations are the same. A general form of these equations can be written as:

$$ax^2 + bx + c = 0 \quad (\text{S58})$$

A solution of Eq. (S58) can be found using a well-known formula:

$$x = \frac{-b \pm \sqrt{D}}{2a} \quad (\text{S59})$$

where  $D = \sqrt{b^2 - 4ac}$

Now we find solutions of Eqs. (S54) and (S57) using the Eq. (S59):

$$D = (\Gamma_{12} + \Gamma_{21} + k_1 + k_2)^2 - 4(\Gamma_{12}k_2 + \Gamma_{21}k_1 + k_1k_2) = (\Gamma_{12} + \Gamma_{21})^2 + (k_1 + k_2)^2 + 2(k_1 + k_2)(\Gamma_{12} + \Gamma_{21}) - 4(\Gamma_{12}k_2 + \Gamma_{21}k_1 + k_1k_2) = (\Gamma_{12} + \Gamma_{21})^2 + (k_1 + k_2)^2 + 2(k_1\Gamma_{12} + k_1\Gamma_{21} + k_2\Gamma_{12} + k_2\Gamma_{21}) - 4(\Gamma_{12}k_2 + \Gamma_{21}k_1 + k_1k_2) = (\Gamma_{12} + \Gamma_{21})^2 + (k_1 - k_2)^2 + 2(k_1\Gamma_{12} - k_1\Gamma_{21} - k_2\Gamma_{12} + k_2\Gamma_{21}) = (\Gamma_{12} + \Gamma_{21})^2 + (k_1 - k_2)^2 + 2(k_1 - k_2)(\Gamma_{12} - \Gamma_{21}) \quad (\text{S59})$$

$$\lambda_{1,2} = \frac{(\Gamma_{12} + \Gamma_{21} + k_1 + k_2) \pm \sqrt{(\Gamma_{12} + \Gamma_{21})^2 + (k_1 - k_2)^2 + 2(k_1 - k_2)(\Gamma_{12} - \Gamma_{21})}}{2} \quad (\text{S60})$$

Taking into account that  $\lambda_1$  and  $\lambda_2$  are reciprocals of lifetimes  $\tau_1$  and  $\tau_2$ , we find:

$$\tau_{1,2} = \frac{1}{\lambda_{1,2}} = \frac{2}{(\Gamma_{12} + \Gamma_{21} + k_1 + k_2) \pm \sqrt{(\Gamma_{12} + \Gamma_{21})^2 + (k_1 - k_2)^2 + 2(k_1 - k_2)(\Gamma_{12} - \Gamma_{21})}} \quad (\text{S61})$$

## References

- (1) Adkins, W. A.; Davidson, M. G. *Ordinary differential equations*; Springer: New York, 2012.
